# Supplementary material
Source: publisher site journal article supplement (https://www.dovepress.com/article/347496)
Supplement: Supplementary file 1 [file get_supplementary_file.php]

**Appendix 1. List of IRBs**

**SONATA study**


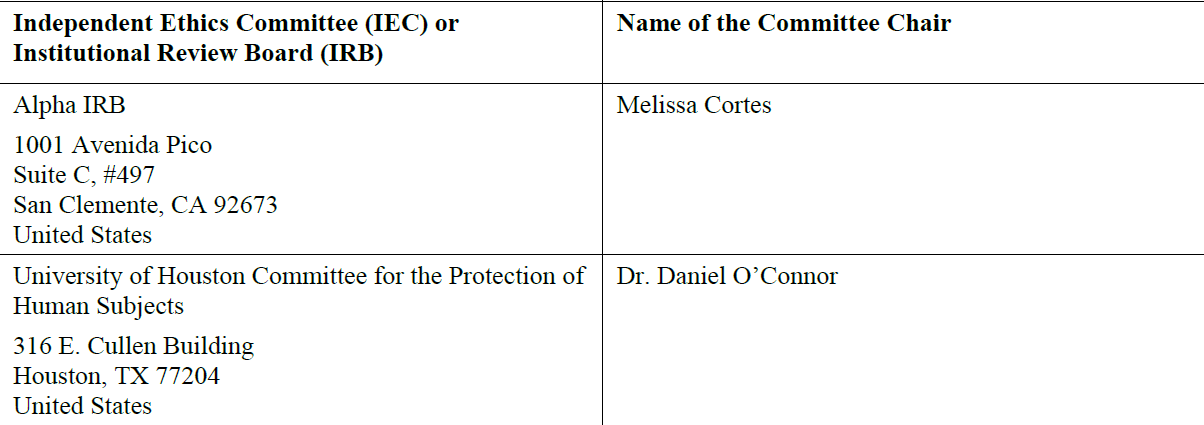


**RWE Chart review study:**

All study materials were approved by the New England Independent Review Board (NEIRB) under the exempt category as data were de-identified and patient informed consent was not required.
